# Supplementary material for: Reduced alcohol consumption during the COVID-19 pandemic: Analyses of 17 000 patients seeking primary health care in Colombia and Mexico
Source: PubMed Central journal article supplement (PMC8932607; doi:10.7189/jogh.12.05002), 2022-03-19
Supplement: jogh-12-05002-s001.pdf [file jogh-12-05002-s001.pdf]

## **Online Supplementary Document**

**Title:** Reduced alcohol consumption during the COVID-19 pandemic: Analyses of 17,000 patients seeking primary health care in Colombia and Mexico

### **Authors:**

Jakob Manthey, Sinclair Carr, Peter Anderson, Natalia Bautista, Fleur Braddick, Amy O'Donnell, Eva Jané-Llopis, Hugo López-Pelayo, Perla Medina, Juliana Mejía-Trujillo, Augusto Pérez-Gómez, Marina Piazza, Jürgen Rehm, Adriana Solovei, Guillermina Natera Rey, Hein de Vries, Bernd Schulte

**Table S1.** ‘Strengthening the Reporting of Observational studies in Epidemiology’ (STROBE) Checklist

|                              | <b>Item No</b> | <b>Recommendation</b>                                                                                                                                                                | <b>Page No</b> |
|------------------------------|----------------|--------------------------------------------------------------------------------------------------------------------------------------------------------------------------------------|----------------|
| Title and abstract           | 1              | (a) Indicate the study’s design with a commonly used term in the title or the abstract                                                                                               | 1              |
|                              |                | (b) Provide in the abstract an informative and balanced summary of what was done and what was found                                                                                  | 1              |
| <b>Introduction</b>          |                |                                                                                                                                                                                      |                |
| Background/rationale         | 2              | Explain the scientific background and rationale for the investigation being reported                                                                                                 | 2-3            |
| Objectives                   | 3              | State specific objectives, including any prespecified hypotheses                                                                                                                     | 3              |
| <b>Methods</b>               |                |                                                                                                                                                                                      |                |
| Study design                 | 4              | Present key elements of study design early in the paper                                                                                                                              | 4              |
| Setting                      | 5              | Describe the setting, locations, and relevant dates, including periods of recruitment, exposure, follow-up, and data collection                                                      | 4              |
| Participants                 | 6              | (a) Give the eligibility criteria, and the sources and methods of selection of participants                                                                                          | 4              |
| Variables                    | 7              | Clearly define all outcomes, exposures, predictors, potential confounders, and effect modifiers. Give diagnostic criteria, if applicable                                             | 4-5            |
| Data sources/<br>measurement | 8*             | For each variable of interest, give sources of data and details of methods of assessment (measurement). Describe comparability of assessment methods if there is more than one group | 4-5            |
| Bias                         | 9              | Describe any efforts to address potential sources of bias                                                                                                                            | -              |
| Study size                   | 10             | Explain how the study size was arrived at                                                                                                                                            | 4              |
| Quantitative<br>variables    | 11             | Explain how quantitative variables were handled in the analyses. If applicable, describe which groupings were chosen and why                                                         | 4-5            |

|                     |     |                                                                                                                                                                                                              |        |
|---------------------|-----|--------------------------------------------------------------------------------------------------------------------------------------------------------------------------------------------------------------|--------|
| Statistical methods | 12  | (a) Describe all statistical methods, including those used to control for confounding                                                                                                                        | 6      |
|                     |     | (b) Describe any methods used to examine subgroups and interactions                                                                                                                                          | -      |
|                     |     | (c) Explain how missing data were addressed                                                                                                                                                                  | 6      |
|                     |     | (d) If applicable, describe analytical methods taking account of sampling strategy                                                                                                                           | -      |
|                     |     | (e) Describe any sensitivity analyses                                                                                                                                                                        | -      |
| <b>Results</b>      |     |                                                                                                                                                                                                              |        |
| Participants        | 13* | (a) Report numbers of individuals at each stage of study—eg numbers potentially eligible, examined for eligibility, confirmed eligible, included in the study, completing follow-up, and analysed            | 7      |
|                     |     | (b) Give reasons for non-participation at each stage                                                                                                                                                         | -      |
|                     |     | (c) Consider use of a flow diagram                                                                                                                                                                           | -      |
| Descriptive data    | 14* | (a) Give characteristics of study participants (eg demographic, clinical, social) and information on exposures and potential confounders                                                                     | 7      |
|                     |     | (b) Indicate number of participants with missing data for each variable of interest                                                                                                                          | Tab. 1 |
| Outcome data        | 15* | Report numbers of outcome events or summary measures                                                                                                                                                         | 8      |
| Main results        | 16  | (a) Give unadjusted estimates and, if applicable, confounder-adjusted estimates and their precision (eg, 95% confidence interval). Make clear which confounders were adjusted for and why they were included | 8      |
|                     |     | (b) Report category boundaries when continuous variables were categorized                                                                                                                                    | 5      |
|                     |     | (c) If relevant, consider translating estimates of relative risk into absolute risk for a meaningful time period                                                                                             | -      |

|                          |    |                                                                                                                                                                            |       |
|--------------------------|----|----------------------------------------------------------------------------------------------------------------------------------------------------------------------------|-------|
| Other analyses           | 17 | Report other analyses done—eg analyses of subgroups and interactions, and sensitivity analyses                                                                             | -     |
| <b>Discussion</b>        |    |                                                                                                                                                                            |       |
| Key results              | 18 | Summarise key results with reference to study objectives                                                                                                                   | 9     |
| Limitations              | 19 | Discuss limitations of the study, taking into account sources of potential bias or imprecision. Discuss both direction and magnitude of any potential bias                 | 9     |
| Interpretation           | 20 | Give a cautious overall interpretation of results considering objectives, limitations, multiplicity of analyses, results from similar studies, and other relevant evidence | 10-12 |
| Generalisability         | 21 | Discuss the generalisability (external validity) of the study results                                                                                                      | 11-12 |
| <b>Other information</b> |    |                                                                                                                                                                            |       |
| Funding                  | 22 | Give the source of funding and the role of the funders for the present study and, if applicable, for the original study on which the present article is based              | 13    |



**Table S1.** Results from mixed-effects regression analyses on monthly trends

| Dependent variable                          | AUDIT-C sum score <sup>†</sup> |                              | % of patients scoring 8+ on AUDIT-C <sup>‡</sup> |                           |
|---------------------------------------------|--------------------------------|------------------------------|--------------------------------------------------|---------------------------|
|                                             | Colombia                       | Mexico                       | Colombia                                         | Mexico                    |
| N                                           | 10,658                         | 6,613                        | 10,444                                           | 6,569                     |
| Intercept                                   | 1.77<br>(1.46 to 2.15)***      | 1.96<br>(1.68 to 2.30)***    | 0.02<br>(0.01 to 0.03)***                        | 0.01<br>(0.01 to 0.03)*** |
| Monthly trend <sup>§</sup>                  | 0.985<br>(0.979 to 0.992)***   | 0.981<br>(0.975 to 0.986)*** | 0.89<br>(0.85 to 0.94)***                        | 0.98<br>(0.96 to 1.01)    |
| Provider sex<br>(men = 1; women = 0)        | 1.29<br>(0.99 to 1.68)         | 1.09<br>(0.93 to 1.28)       | 0.79<br>(0.29 to 2.14)                           | 1.50<br>(0.82 to 2.74)    |
| Provider age<br>(reference = 17 to 29)      |                                |                              |                                                  |                           |
| 30-39                                       | 1.08<br>(0.84 to 1.39)         | 1.11<br>(0.93 to 1.32)       | 0.56<br>(0.20 to 1.64)                           | 1.08<br>(0.53 to 2.16)    |
| 40-49                                       | 0.77<br>(0.58 to 1.04)         | 1.10<br>(0.90 to 1.35)       | 0.42<br>(0.13 to 1.32)                           | 1.98<br>(0.93 to 4.21)    |
| 50-59                                       | 1.08<br>(0.67 to 1.74)         | 1.00<br>(0.76 to 1.32)       | 0.22<br>(0.02 to 3.02)                           | 1.20<br>(0.41 to 3.57)    |
| 60-69                                       | 0.52<br>(0.30 to 0.89)*        | 1.04<br>(0.77 to 1.41)       | 0.68<br>(0.10 to 4.60)                           | 0.81<br>(0.24 to 2.73)    |
| 70+                                         | NA                             | 0.93<br>(0.42 to 2.04)       | NA                                               | 2.70<br>(0.19 to 39.12)   |
| Not reported                                | 1.50<br>(0.74 to 3.05)         | 1.02<br>(0.72 to 1.43)       | NA                                               | NA                        |
| Provider profession<br>(reference = Doctor) |                                |                              |                                                  |                           |
| Nurse (technician)                          | 1.57<br>(1.25 to 1.98)***      | 1.04<br>(0.69 to 1.59)       | 2.28<br>(0.93 to 5.63)                           | 3.35<br>(0.74 to 15.16)   |
| Midwife or social worker                    | 1.56<br>(0.67 to 3.60)         | 1.45<br>(0.86 to 2.42)       | 7.39<br>(0.45 to 121.16)                         | NA                        |
| Psychologist                                | 1.29<br>(0.71 to 2.35)         | 0.98<br>(0.81 to 1.17)       | 9.71<br>(0.63 to 150.51)                         | 1.23<br>(0.61 to 2.52)    |
| Other / not reported                        | 0.85<br>(0.52 to 1.41)         | 0.85<br>(0.70 to 1.05)       | NA                                               | 0.56<br>(0.23 to 1.39)    |
| Patient sex<br>(reference = women)          |                                |                              |                                                  |                           |
| Men                                         | 2.04<br>(1.95 to 2.14)***      | 2.10<br>(2.00 to 2.21)***    | 7.83<br>(5.94 to 10.31)***                       | 4.99<br>(3.60 to 6.92)*** |
| Not reported                                | 1.19<br>(1.02 to 1.38)*        | 1.36<br>(1.00 to 1.84)*      | 1.18<br>(0.36 to 3.90)                           | NA <sup>l</sup>           |
| Patient age<br>(reference = 18 to 29)       |                                |                              |                                                  |                           |
| 30-39                                       | 0.98<br>(0.92 to 1.04)         | 0.92<br>(0.86 to 0.98)*      | 0.77<br>(0.55 to 1.09)                           | 0.96<br>(0.63 to 1.44)    |

|                                                          |                           |                           |                           |                           |
|----------------------------------------------------------|---------------------------|---------------------------|---------------------------|---------------------------|
| 40-49                                                    | 0.90<br>(0.85 to 0.96)**  | 0.84<br>(0.78 to 0.90)*** | 0.75<br>(0.52 to 1.01)    | 0.98<br>(0.65 to 1.47)    |
| 50-59                                                    | 0.75<br>(0.70 to 0.80)*** | 0.66<br>(0.61 to 0.72)*** | 0.66<br>(0.44 to 1.01)    | 0.56<br>(0.34 to 0.90)*   |
| 60-69                                                    | 0.56<br>(0.52 to 0.61)*** | 0.53<br>(0.48 to 0.58)*** | 0.24<br>(0.13 to 0.42)*** | 0.36<br>(0.19 to 0.68)**  |
| 70+                                                      | 0.27<br>(0.24 to 0.30)*** | 0.38<br>(0.33 to 0.44)*** | 0.11<br>(0.05 to 0.26)*** | 0.13<br>(0.04 to 0.44)*** |
| Not reported                                             | 0.92<br>(0.79 to 1.07)    | 0.69<br>(0.51 to 0.93)*   | NA                        | NA                        |
| Patient education<br>(reference = Less than high school) |                           |                           |                           |                           |
| High school                                              | 1.25<br>(1.19 to 1.31)*** | 1.04<br>(0.98 to 1.10)    | 0.92<br>(0.68 to 1.24)    | 0.72<br>(0.45 to 1.04)    |
| Beyond high school                                       | 1.16<br>(1.06 to 1.26)*** | 1.13<br>(1.06 to 1.21)*** | 0.73<br>(0.45 to 1.20)    | 0.80<br>(0.53 to 1.19)    |
| Not reported                                             | 1.24<br>(1.08 to 1.42)**  | 1.01<br>(0.78 to 1.3)     | 0.73<br>(0.30 to 1.75)    | 0.86<br>(0.19 to 3.90)    |

Note. \*  $P \leq 0.05$  ; \*\*  $P \leq 0.01$  ; \*\*\*  $P \leq 0.001$

<sup>†</sup>Negative binomial mixed-effects regression analyses, with random intercepts for providers clustered within primary health care practices. Presented are Incidence Rate Ratios, i.e. exponentiated coefficients. Numbers in brackets indicate Wald-based confidence intervals.

<sup>‡</sup>Logistic mixed-effects regression analyses, with random intercepts for providers clustered within primary health care practices. Presented are Odds Ratios, i.e. exponentiated coefficients. Numbers in brackets indicate Wald-based confidence intervals.

<sup>§</sup>centered at beginning of COVID-19 pandemic.

<sup>¶</sup>N=44 cases were excluded from the regression model because none of them scored 8+ on the AUDIT-C resulting in singularity issues.

Abbreviation: AUDIT-C = Alcohol Use Disorder Identification Test – Consumption

**Table S2.** Results from mixed-effects regression analyses on period effect

| Dependent variable                                                                 | AUDIT-C sum score <sup>†</sup> |                           | % of patients scoring 8+ on AUDIT-C <sup>‡</sup> |                           |
|------------------------------------------------------------------------------------|--------------------------------|---------------------------|--------------------------------------------------|---------------------------|
|                                                                                    | Colombia                       | Mexico                    | Colombia                                         | Mexico                    |
| N                                                                                  | 10,658                         | 6,613                     | 10,444                                           | 6,569                     |
| Intercept                                                                          | 1.92<br>(1.58 to 2.33)***      | 2.09<br>(1.79 to 2.45)*** | 0.02<br>(0.01 to 0.05)***                        | 0.02<br>(0.01 to 0.03)*** |
| Period effect<br>(Reference period:<br>data collected prior<br>the pandemic onset) | 0.79<br>(0.76 to 0.84)***      | 0.86<br>(0.80 to 0.92)*** | 0.41<br>(0.26 to 0.64)***                        | 0.81<br>(0.55 to 1.20)    |
| Provider sex<br>(men = 1; women =<br>0)                                            | 1.31<br>(1.00 to 1.70)*        | 1.06<br>(0.91 to 1.23)    | 0.80<br>(0.29 to 2.21)                           | 1.48<br>(0.81 to 2.71)    |
| Provider age<br>(reference = 17 to<br>29)                                          |                                |                           |                                                  |                           |
| 30-39                                                                              | 1.08<br>(0.84 to 1.38)         | 1.09<br>(0.91 to 1.29)    | 0.52<br>(0.18 to 1.53)                           | 1.07<br>(0.53 to 2.15)    |
| 40-49                                                                              | 0.77<br>(0.57 to 1.02)         | 1.10<br>(0.90 to 1.33)    | 0.36<br>(0.11 to 1.15)                           | 1.99<br>(0.94 to 4.21)    |
| 50-59                                                                              | 1.07<br>(0.67 to 1.72)         | 0.98<br>(0.76 to 1.28)    | 0.24<br>(0.02 to 3.33)                           | 1.20<br>(0.41 to 3.54)    |
| 60-69                                                                              | 0.53<br>(0.31 to 0.90)*        | 1.04<br>(0.77 to 1.39)    | 0.70<br>(0.10 to 4.85)                           | 0.81<br>(0.24 to 2.72)    |
| 70+                                                                                | NA                             | 0.91<br>(0.42 to 1.98)    | NA                                               | 2.66<br>(0.18 to 38.70)   |
| Not reported                                                                       | 1.42<br>(0.70 to 2.87)         | 0.96<br>(0.69 to 1.33)    | NA                                               | NA                        |
| Provider profession<br>(reference = Doctor)                                        |                                |                           |                                                  |                           |
| Nurse (technician)                                                                 | 1.59<br>(1.26 to 2.00)***      | 1.07<br>(0.71 to 1.63)    | 2.53<br>(1.02 to 6.26)*                          | 3.39<br>(0.75 to 15.31)   |
| Midwife or social<br>worker                                                        | 1.60<br>(0.69 to 3.67)         | 1.37<br>(0.83 to 2.25)    | 9.66<br>(0.58 to 162.34)                         | NA                        |
| Psychologist                                                                       | 1.25<br>(0.69 to 2.27)         | 0.93<br>(0.78 to 1.11)    | 9.71<br>(0.61 to 155.83)                         | 1.23<br>(0.61 to 2.50)    |
| Other / not reported                                                               | 0.85<br>(0.52 to 1.39)         | 0.87<br>(0.71 to 1.06)    | NA                                               | 0.56<br>(0.23 to 1.39)    |
| Patient sex<br>(reference = women)                                                 |                                |                           |                                                  |                           |
| Men                                                                                | 2.04<br>(1.94 to 2.13)***      | 2.10<br>(2.00 to 2.21)*** | 7.85<br>(5.96 to 10.35)***                       | 5.00<br>(3.61 to 6.94)*** |
| Not reported                                                                       | 1.20<br>(1.03 to 1.50)*        | 1.33<br>(0.98 to 1.80)    | 1.24<br>(0.38 to 4.12)                           | NA <sup>§</sup>           |
| Patient age<br>(reference = 18 to<br>29)                                           |                                |                           |                                                  |                           |



|                                                          |                           |                           |                           |                           |
|----------------------------------------------------------|---------------------------|---------------------------|---------------------------|---------------------------|
| 30-39                                                    | 0.97<br>(0.92 to 1.03)    | 0.92<br>(0.86 to 0.99)*   | 0.76<br>(0.54 to 1.07)    | 0.96<br>(0.63 to 1.45)    |
| 40-49                                                    | 0.90<br>(0.85 to 0.96)*** | 0.83<br>(0.78 to 0.90)*** | 0.75<br>(0.52 to 1.09)    | 0.98<br>(0.65 to 1.47)    |
| 50-59                                                    | 0.74<br>(0.70 to 0.79)*** | 0.66<br>(0.61 to 0.71)*** | 0.65<br>(0.43 to 0.99)*   | 0.56<br>(0.34 to 0.90)*   |
| 60-69                                                    | 0.56<br>(0.52 to 0.60)*** | 0.53<br>(0.48 to 0.58)*** | 0.23<br>(0.13 to 0.41)*** | 0.36<br>(0.19 to 0.68)**  |
| 70+                                                      | 0.27<br>(0.24 to 0.29)*** | 0.38<br>(0.33 to 0.44)*** | 0.11<br>(0.05 to 0.25)*** | 0.13<br>(0.04 to 0.44)*** |
| Not reported                                             | 0.90<br>(0.77 to 1.05)    | 0.69<br>(0.51 to 0.94)*   | NA                        | NA                        |
| Patient education<br>(reference = Less than high school) |                           |                           |                           |                           |
| High school                                              | 1.25<br>(1.19 to 1.31)*** | 1.04<br>(0.98 to 1.10)    | 0.91<br>(0.68 to 1.24)    | 0.72<br>(0.45 to 1.04)    |
| Beyond high school                                       | 1.16<br>(1.06 to 1.26)*** | 1.12<br>(1.05 to 1.20)*** | 0.73<br>(0.45 to 1.19)    | 0.78<br>(0.53 to 1.19)    |
| Not reported                                             | 1.23<br>(1.08 to 1.41)**  | 1.00<br>(0.78 to 1.29)    | 0.71<br>(0.30 to 1.71)    | 0.86<br>(0.19 to 3.87)    |

Note. \*  $P \leq .05$  ; \*\*  $P \leq .01$  ; \*\*\*  $P \leq .001$

<sup>†</sup>Negative binomial mixed-effects regression analyses, with random intercepts for providers clustered within primary health care practices. Presented are Incidence Rate Ratios, i.e. exponentiated coefficients. Numbers in brackets indicate Wald-based confidence intervals.

<sup>‡</sup>Logistic mixed-effects regression analyses, with random intercepts for providers clustered within primary health care practices. Presented are Odds Ratios, i.e. exponentiated coefficients. Numbers in brackets indicate Wald-based confidence intervals.

<sup>§</sup>N=44 cases were excluded from the regression model because none of them scored 8+ on the AUDIT-C resulting in singularity issues.

Abbreviation: AUDIT-C = Alcohol Use Disorder Identification Test – Consumption

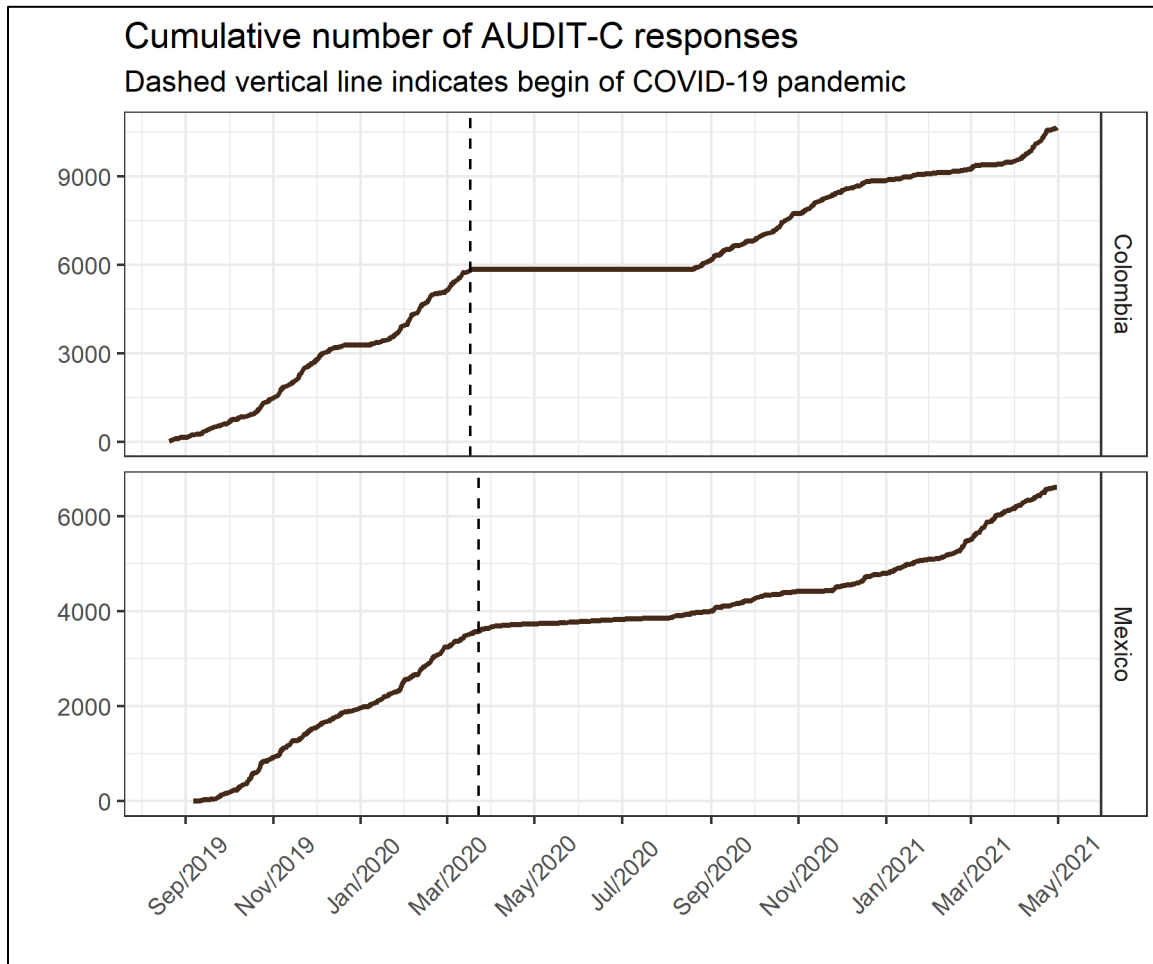

**Appendix Figure 1.** Cumulative number of AUDIT-C responses collected from primary health care patients in Colombia and Mexico. Dashed vertical lines indicate onset in COVID-19 pandemic in Colombia (17 March, 2020) and Mexico (March 23, 2020).

Abbreviation: AUDIT-C = Alcohol Use Disorder Identification Test – Consumption

Appendix Figure 2 illustrates the distribution of AUDIT-C scores among drinking patients (AUDIT-C score > 0) across the study period. In Colombia, available data from the pandemic show an overall decline in the median AUDIT-C score, with more than half of all consulting patients reporting to abstain from alcohol altogether (AUDIT-C score = 0). The share of patients scoring 8+ on the AUDIT-C or more ranged between 8 and 15% in the months August to December 2019 and declined to about 3% in January to March 2020. In ten out of eleven months during the COVID-19 pandemic (August 2020 to April 2021), less than 3% patients reported heavy drinking levels.

In Mexico, the share of heavy drinking patients was less variable in the pre-pandemic period (September 2019 and February 2020) and ranged between 4.0 and 6.1%. In the following months, the variation increased and both considerably lower (0% in July 2020) and higher (9.4% in June 2020) heavy drinking prevalence rates were recorded.

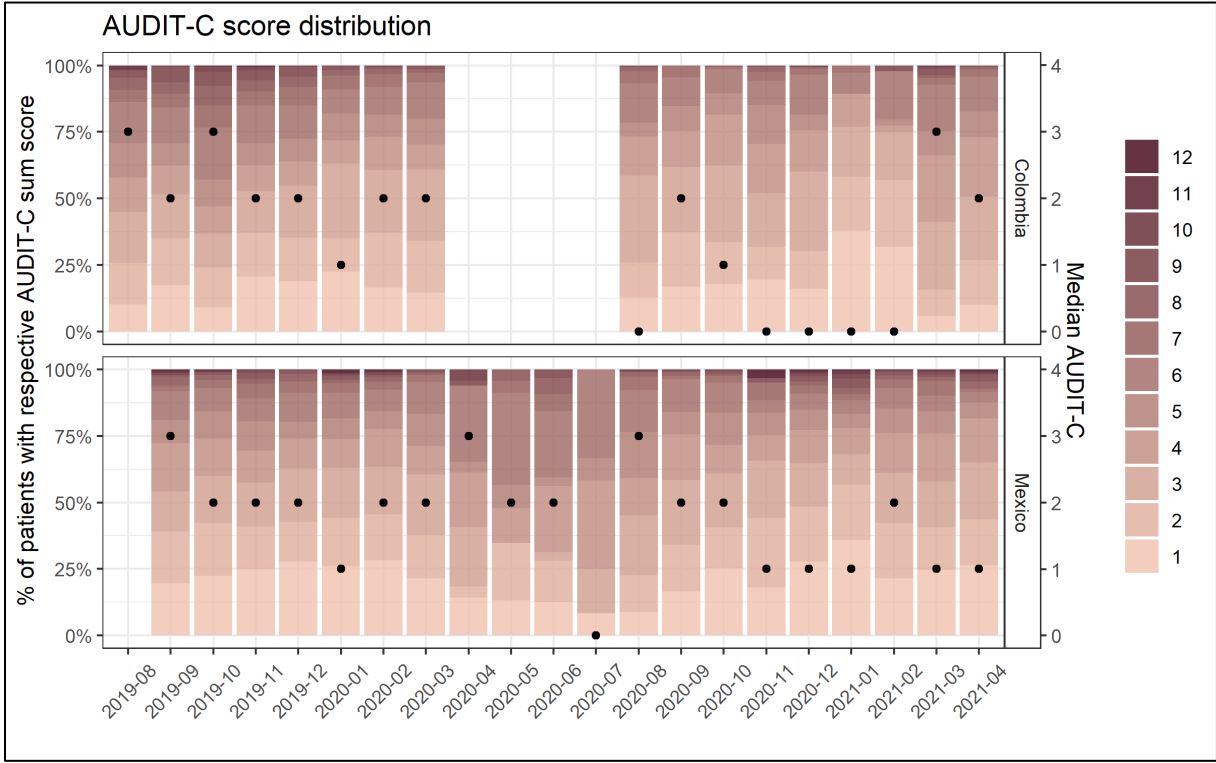

**Appendix Figure 2.** Distribution of the AUDIT-C score among primary health care patients documented by consulting providers in Mexico and Colombia

Abbreviation: AUDIT-C = Alcohol Use Disorder Identification Test – Consumption
